# Supplementary material
Source: publisher figshare collection journal article supplement (https://frontiersin.figshare.com/ndownloader/files/14671601)
Supplement: Supplementary file [file 14671601]

**Supplemental Information:**

**Fatty acid oxidation promotes cardiomyocyte proliferation rate but does not change cardiomyocyte number in infant mice**

Tongtong Cao<sup>\*</sup>, Daniela Luccardo<sup>\*</sup>, Ryan LaCanna, Xiaoying Zhang, Rong Lu, Brian N. Finck, Tani Leigh, Xiongwen Chen, Konstantinos Drosatos, Ying Tian

Correspondence should be addressed to: Ying Tian, email: [ying.tian@temple.edu](mailto:ying.tian@temple.edu)

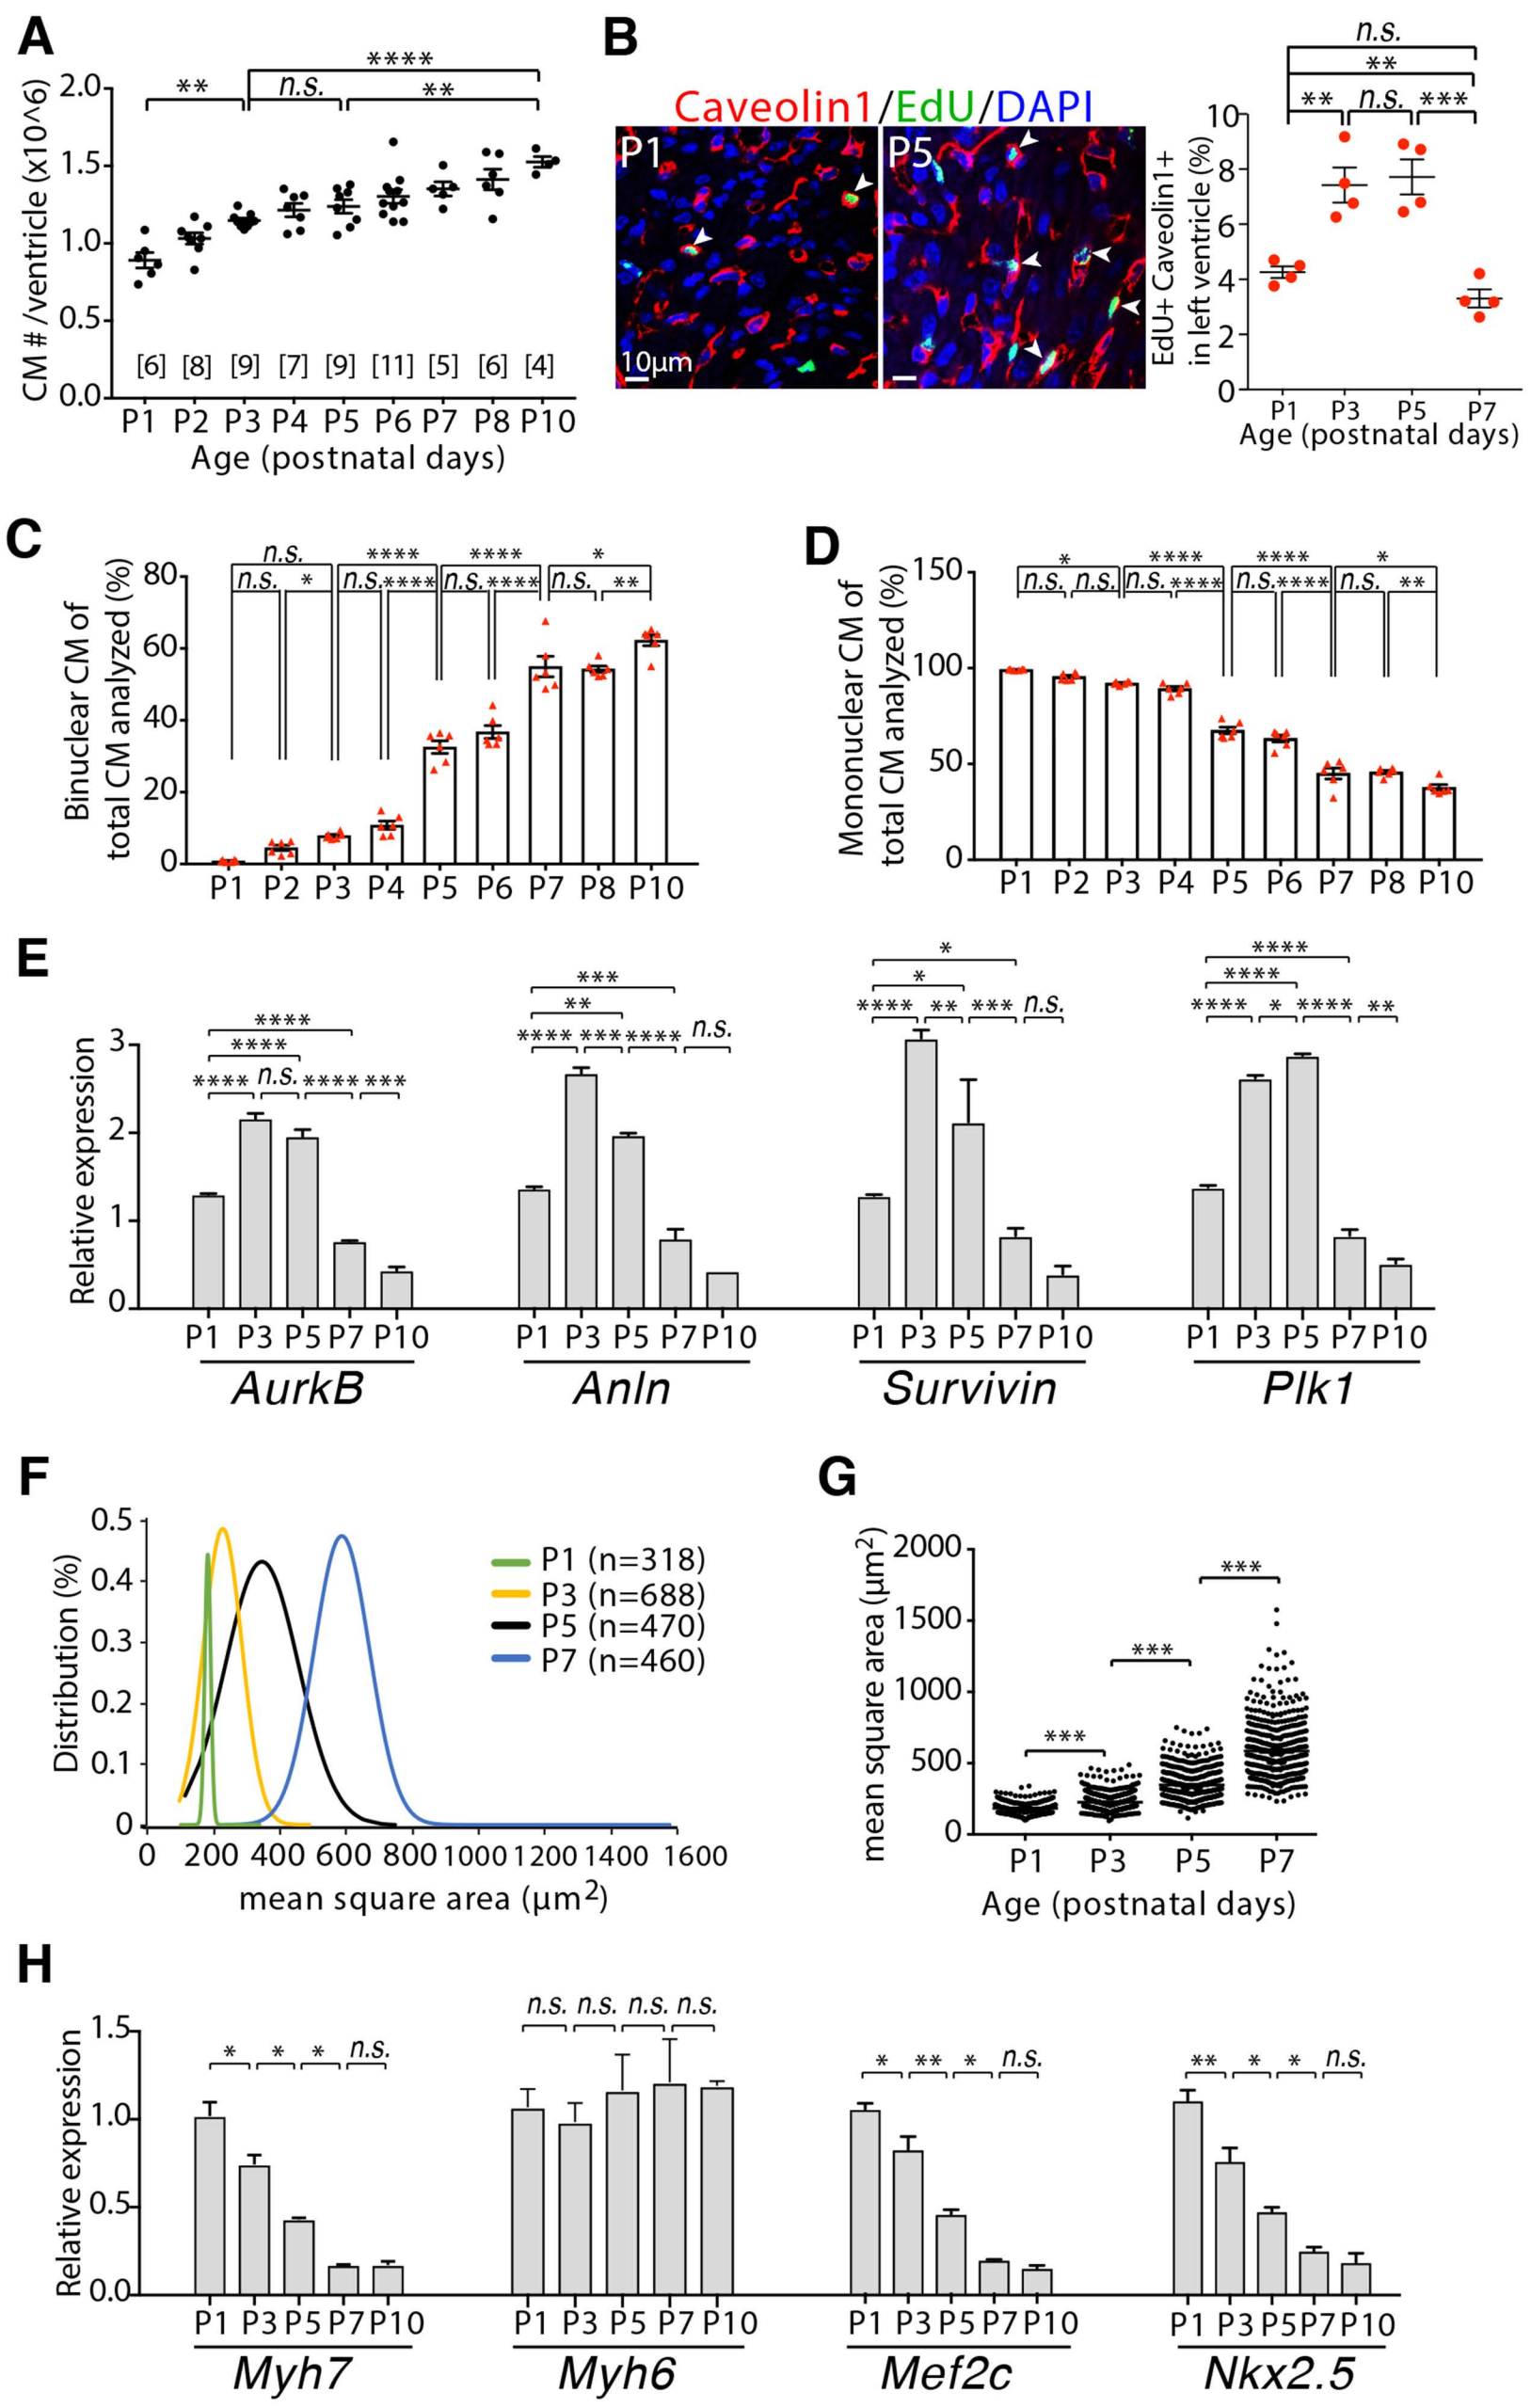

**Supplemental Figure 1. Infant mouse hearts show evidence for cardiomyocyte cycling, hypertrophic growth and maturation.** (A) Total number of cardiomyocytes (CM) in both cardiac ventricles of mice. (B) Confocal images of EdU+ cardiomyocytes on tissue sections using Click-iT EdU Alexa Fluor (green) and co-immunostaining with antibody against caveolin1. Arrows point to EdU+Caveolin1+ cells. Graph on the right showing quantification of EdU+Caveolin1+ cells as percentage of total caveolin1+ cells analyzed per field. (C and D) Percentage of binuclear (C) and mononuclear (D) cardiomyocytes (CM) in the heart ventricles of infant mice. (E and H) Expression of indicated genes by qRT-PCR analysis of the mRNA of isolated heart ventricles at indicated time points (n= 5-6 per time point). (F and G) The frequency distribution (F) and mean square areas (G) of the surface area of cardiomyocytes isolated from infant mouse heart ventricles. *P* value was calculated using one-way ANOVA.

Supplemental Table 1. qRT-PCR primer sequences used in this study.

|               | Forward                  | Reverse                |
|---------------|--------------------------|------------------------|
| Myh6          | CCACTTCTCCTTGGTCCACTATG  | ACAAACCCACCACCGTCTCA   |
| Myh7          | AAGGGCCTGAATGAGGAGTAGCTC | GCAAAGGCTCCAGGTCTGA    |
| Mef2c         | GCCAGCACTG ACATGGATAAG   | CCATTGAGGGCCCTTCTTTCT  |
| Gata4         | CCGGGCTGTCATCTCACTATG    | TTCAGAGCAGACAGCACTGGAT |
| Nkx2.5        | TGACCCAGCCAAAGACCCT      | CCATCCGTCTCGGCTTTGT    |
| Acta1         | TGAAGATGGGTAAAGCGGAG     | TTCGTCGCACATGGTGTCTA   |
| Nppa          | GGGTAGGATTGACAGGATTGG    | CTCCTTGGCTGTTATCTTCGG  |
| Nppb          | CTGAAGGTGCTGTCCCAGAT     | CCTTGGTCCTTCAAGAGCTG   |
| Acaca         | CTGGGACAAAGAACCATCCA     | ATAATCTGGATGCCCCCAAG   |
| Acacb         | CCGAGTTTGTCACTCGGTTT     | GCATACACTTGACCGCAGC    |
| Acadm         | AGCTCTAGACGAAGCCACGA     | TGAGCCTAGCGAGTTCAACC   |
| Acadl         | AACGTCTGGACTCCGGTTCT     | CGGGTACTCCCACATGTACC   |
| Cpt1b         | TCTCCATGGGACTGGTCGAT     | ACCATGCTGAGAAGTGCCTC   |
| PPar $\alpha$ | CAGTCCATCGGTGAGGAGAG     | CTGGAAGCTGGAGAGAGGGT   |
| Pdk4          | CGTTCCTTCACACCTTCACC     | GGTCAAGGAAGGACGGTTTT   |
| Ccnd1         | TTCCTCTCCAAAATGCCAGA     | AGGGTGGGTGGAATGAAC     |
| Ccnd2         | GAACCTGGCCGCAGTCACCC     | CGACGGCGGGTACATGGCAA   |
| Bcl2          | GTGGATGACTGAGTACCTGAAC   | GAGACAGCCAGGAGAAATCAA  |
| Bax           | GTGGTTGCCCTCTTCTACTTT    | CAGCCCATGATGGTTCTGAT   |
| 18S           | TCAAGAACGAAAGTCGGAGG     | GGACATCTAAGGGCATCAC    |
